# Supplementary material for: Therapeutic Drug Monitoring in Children and Adolescents: Findings on Fluoxetine from the TDM-VIGIL Trial
Source: MDPI journal article supplement (doi:10.3390/pharmaceutics15092202), 2023-08-25
Supplement: s1 [file s1]

## **Supplement S1**

Assessment of adherence to medication:

The following input options were available to treating physicians to assess adherence and were stored in the database.

- 1- certain
- 2- probably
- 3- uncertain
- 4- demonstrable intake error
- 5- not yet known
